# Supplementary material for: Probing chemical induced cellular stress by non-Faradaic electrochemical impedance spectroscopy using an Escherichia coli capacitive biochip
Source: Royal Society of Chemistry journal article supplement (doi:10.1039/c1an15202e), 2011-01-01
Supplement: c1an15202e.pdf [file c1an15202e.pdf]

## Supporting Information

# Probing chemical induced cellular stress by non-Faradaic electrochemical impedance spectroscopy using *Escherichia coli* capacitive biochip

Anjum Qureshi, Yasar Gurbuz, and Javed H. Niazi\*

Faculty of Engineering and Natural Sciences, Sabanci University, Orhanli, Tuzla 34956 Istanbul, Turkey

\*Corresponding author Email: [javed@sabanciuniv.edu](mailto:javed@sabanciuniv.edu)

### **CORRESPONDING ADDRESS:**

Faculty of Engineering and Natural Sciences, Sabanci University, Orhanli, Tuzla 34956 Istanbul,  
Turkey. Email: [javed@sabanciuniv.edu](mailto:javed@sabanciuniv.edu), Phone: +90 216 483 9879; Fax: +90 216 483 9550

## EXPERIMENTAL METHODS

**Immobilization of CNTs on GID electrode capacitor arrays.** The bare GID electrode capacitor array chip was immersed into a solution of 1 mM 95% cysteamine (Sigma-Aldrich) in ethanol for 24 h. The chip was removed and washed with ethanol and dried under a stream of N<sub>2</sub> gas. The self-assembled monolayer (SAM) of cysteamine formed on gold surface through –SH groups contained free –NH<sub>2</sub> groups that were utilized to covalently attach carboxylated multiwalled carbon nanotubes (carboxy-CNTs). For this, 100 μL of 1 mg/mL carboxy-CNTs (Arry®, Germany) in 99.9% dimethyl sulfoxide (Sigma-Aldrich) was mixed with equal volume of a mixture of 200 mM of 1-Ethyl-3-[3-dimethylaminopropyl] carbodiimide hydrochloride (EDC) and 100 mM *N*-hydroxysuccinimide (NHS) and ultrasonicated with alternative cycles of 10 s pulse after every 10 s interval for 5 min using ultrasonicator probe (Vibra cell 75043). The carboxy-CNTs suspension was incubated for 4 h at room temperature. About 5 μL of this suspension was dropped on each GID electrode covering an area of 3 mm<sup>2</sup> of a each capacitor in an array capacitors on SiO<sub>2</sub> wafer that were previously activated with cysteamine self-assembled monolayer. The capacitor chips were then incubated in airtight moist chamber for 24 h for covalent attachment of carboxy-CNTs. The capacitor arrays were then washed first with 50% DMSO in water followed by washing with acetone to remove traces of unbound carboxy-CNTs and dried over N<sub>2</sub> gas. A capacitor array without carboxy-CNT immobilization was used as a control for the comparison. A schematic diagram is shown in Supporting Information (SI) Figure S-1.

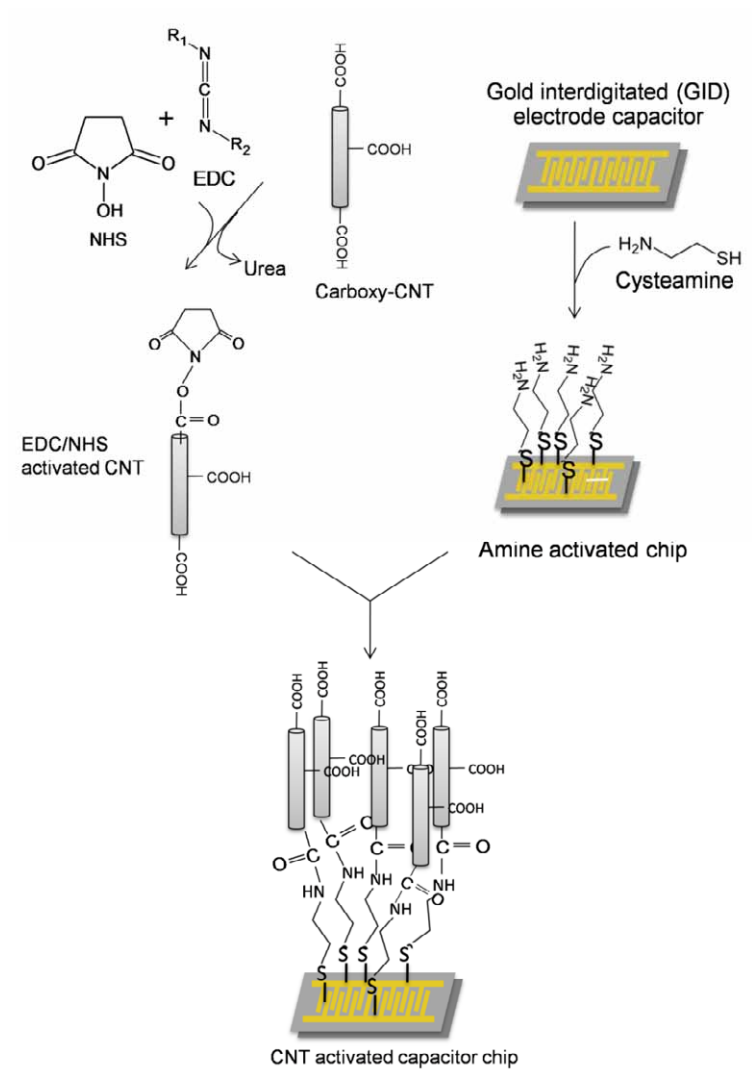

**Fig. S-1.** Schematic diagram of activation of gold interdigitated electrode capacitor chip with carboxy-CNT fictionalization.

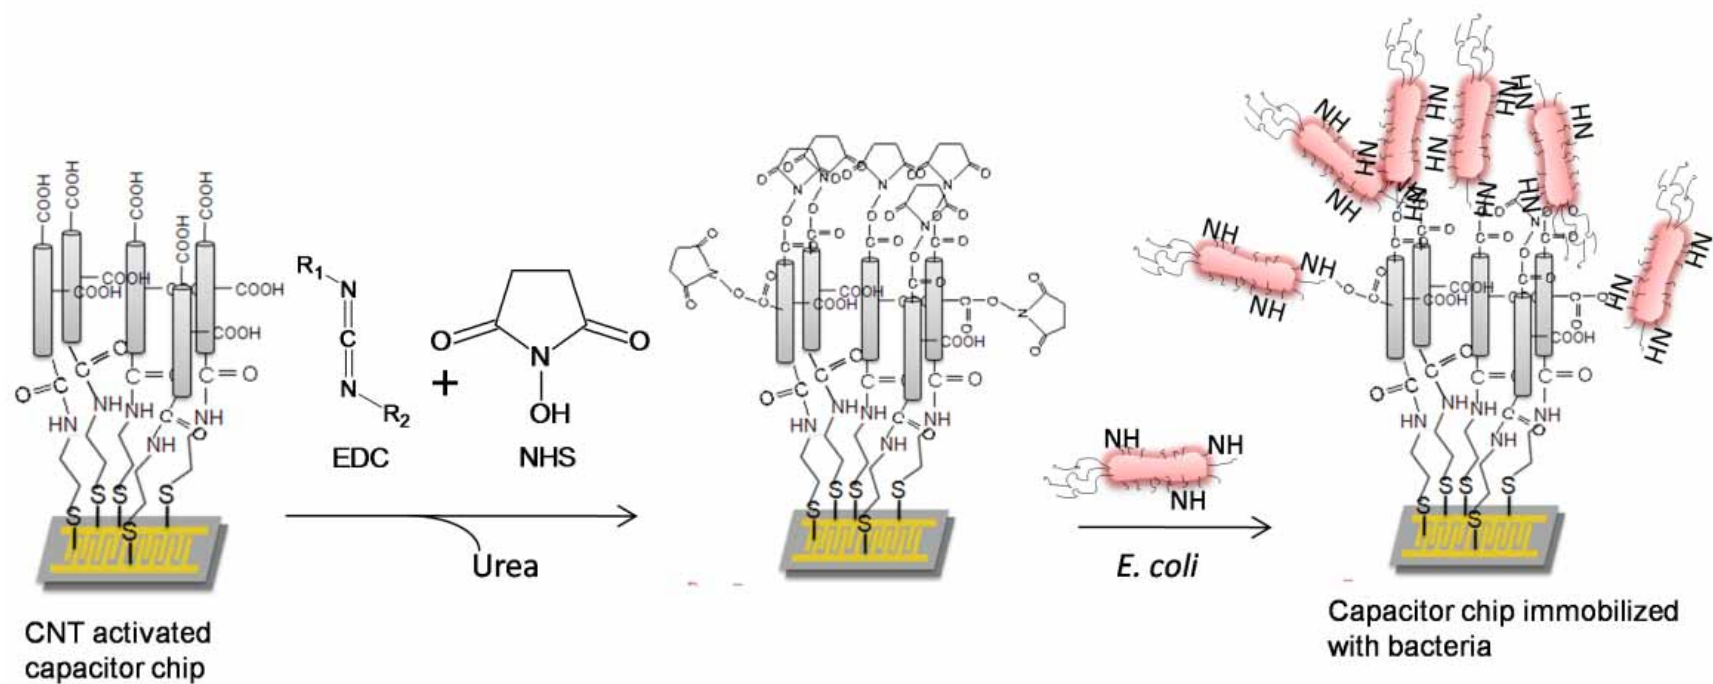

**Fig. S-2.** Schematic diagram of biofunctionalization of carboxy-CNT activated GID capacitor chip and immobilization of *E. coli* cells to develop biochip.

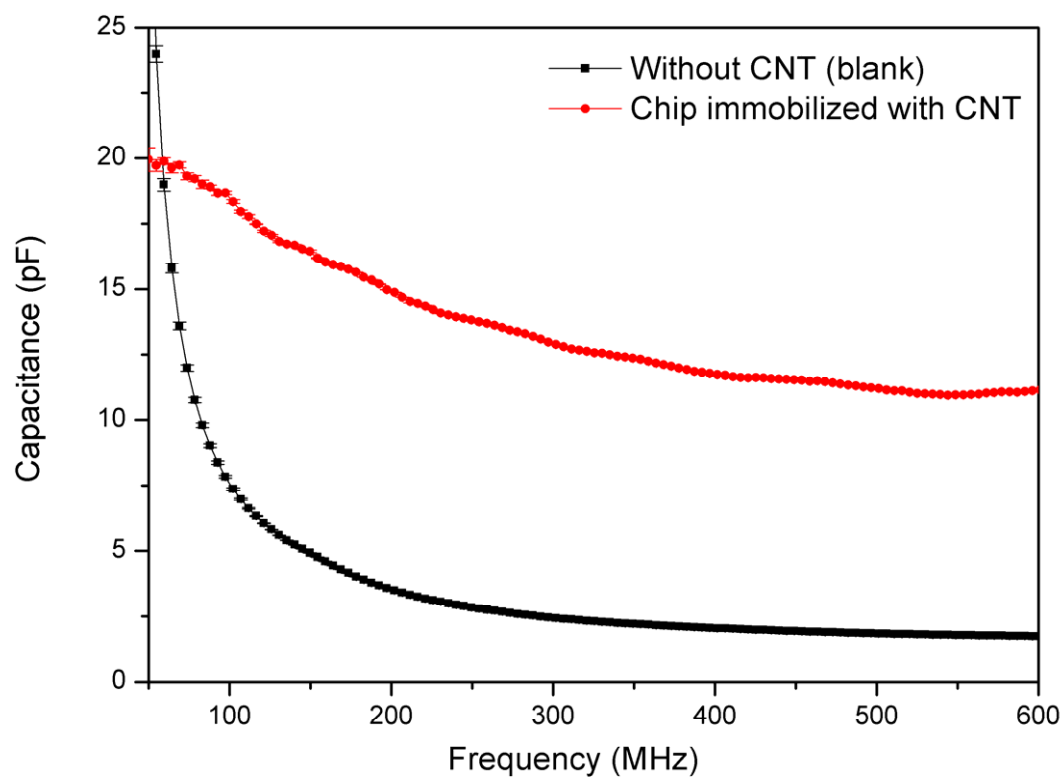

**Fig. S-3.** Capacitive response of gold interdigitated capacitor chip before and after carboxy-CNT immobilization.

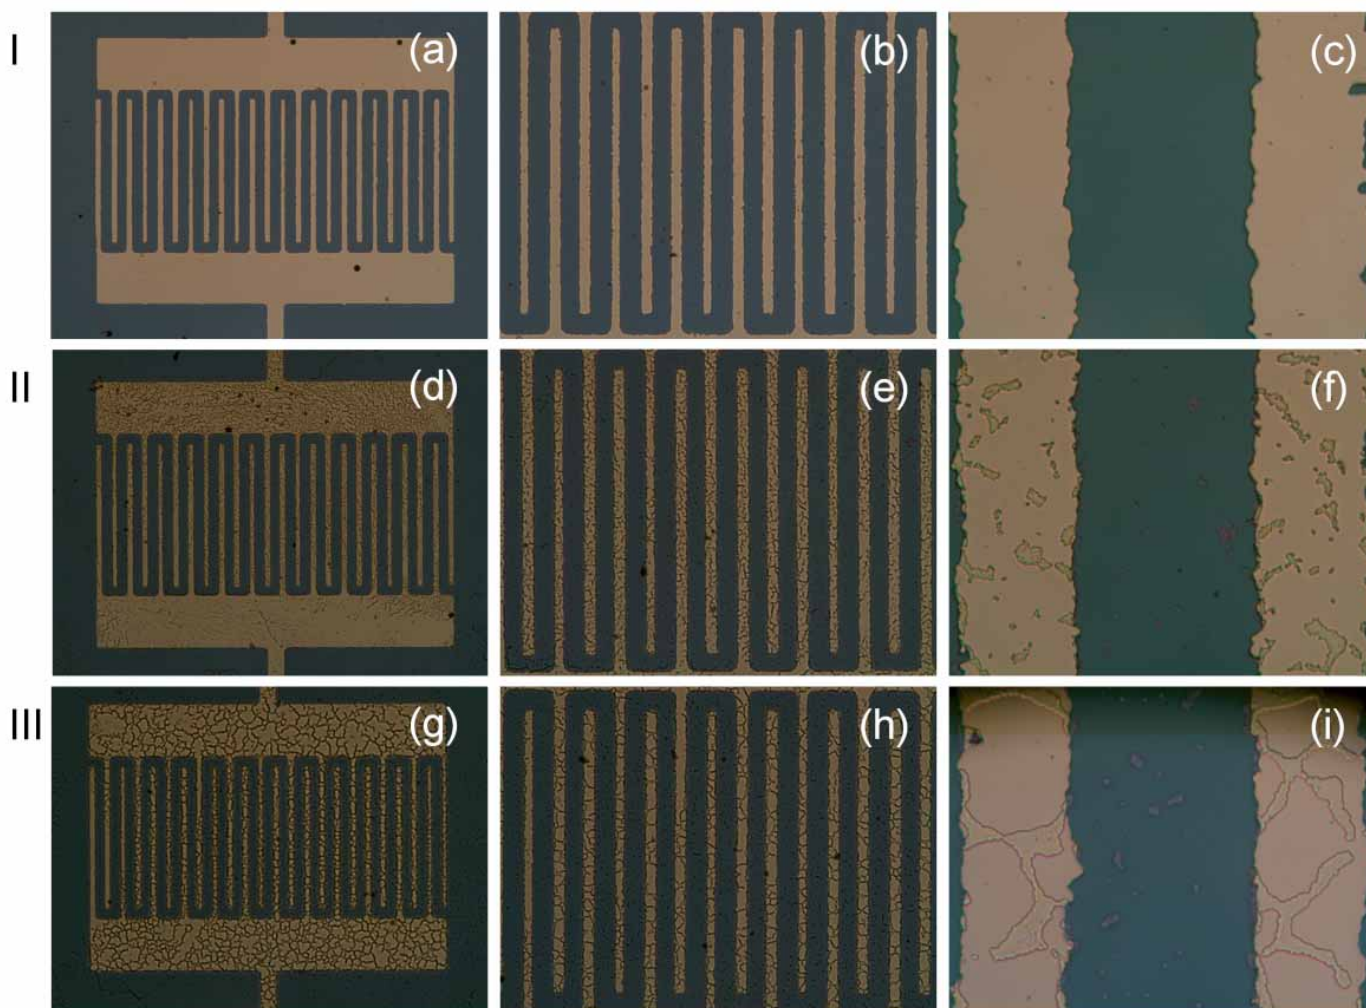

**Fig. S-4.** Optical micrographs of gold interdigitated capacitor surface: (I) activated with carboxy-CNTs (control), and carboxy-CNT activated chips immobilized with *E. coli* with concentrations of (II)  $8.7 \times 10^6$  cells and (III)  $1.7 \times 10^7$  cells. The rows (a-c, d-f and g-i) indicate optical resolutions of 5X, 10X and 100X, respectively.

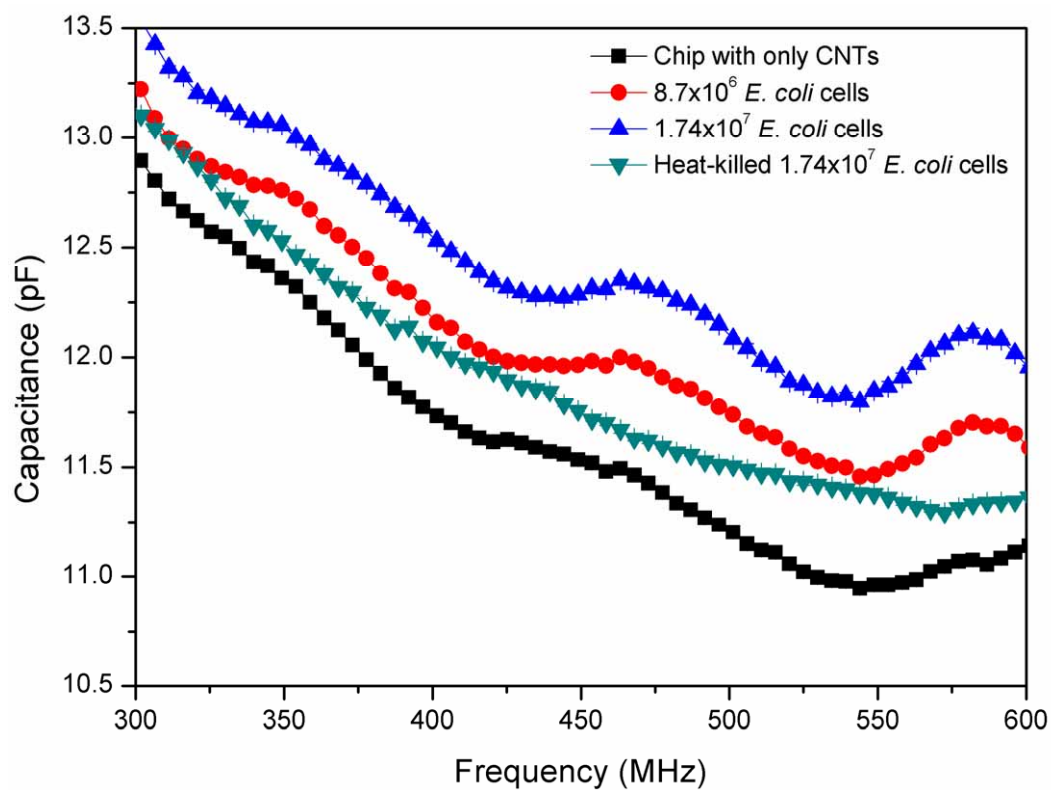

**Fig. S-5.** Capacitive response of bare GID surface covalently linked with only carboxy-CNTs (shown in black); biochip immobilized with viable  $8.7 \times 10^6$  cells (red) and  $1.74 \times 10^7$  cells (blue); and heat-killed  $1.74 \times 10^7$  cells (green) on GID surface that was previously activated with carboxy-CNTs. The capacitive responses were observed at a frequency range of 300-600 MHz.

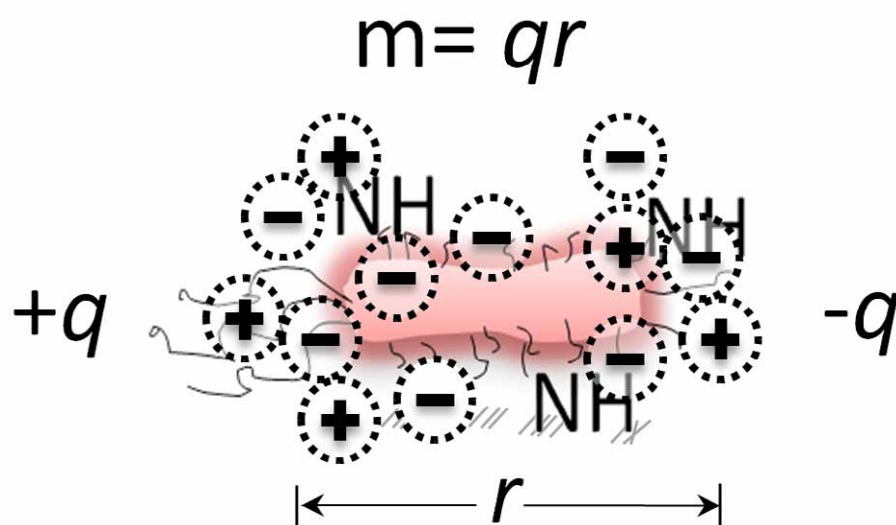

**Fig. S-6.** Schematic diagram of a typical cell surrounded by a cloud of charges that constitutes a molecular dipole  $m$  by two equal and opposite unit charges, separated by a distance  $r$  on an outer cell surface.
